# Supplementary material for: Design and Analysis of a Single System of Impedimetric Biosensors for the Detection of Mosquito-Borne Viruses
Source: MDPI journal article supplement (doi:10.3390/bios11100376), 2021-10-07
Supplement: s1 [file s1]

## **Supplementary Material**

### **Design and analysis of a single system of impedimetric biosensor for the detection of mosquito-borne viral diseases**

Fahmida Nasrin<sup>1</sup>, Kenta Tsuruga<sup>2</sup>, Doddy Irawan Setyo Utomo<sup>3</sup>, Ankan Dutta  
Chowdhury<sup>1</sup>, Enoch Y. Park<sup>1,2,3\*</sup>

1 Laboratory of Biotechnology, Research Institute of Green Science and Technology,  
Shizuoka University, 836 Ohya, Suruga-ku, Shizuoka 422-8529, Japan

2 Laboratory of Biotechnology, Department of Agriculture, Graduate School of  
Integrated Science and Technology, Shizuoka University, 836 Ohya, Suruga-ku, Shizuoka  
422-8529, Japan

3 Laboratory of Biotechnology, Graduate School of Science and Technology, Shizuoka  
University, 836 Ohya, Suruga-ku, Shizuoka 422-8529, Japan

\* Correspondence: park.enoch@shizuoka.ac.jp

**Table S1.** (a) Circuit diagram for the electrochemical fitting, (b) The electrochemical parameters of the sensor electrode obtained from impedimetric circuit diagram.

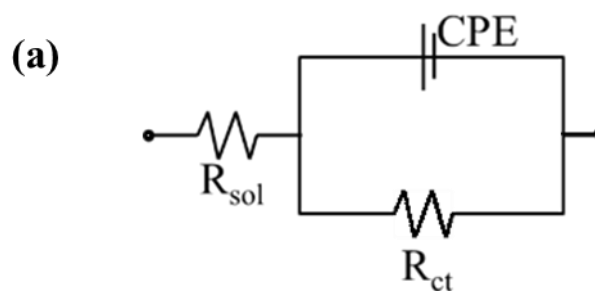

(b)

|                         |                         | $R_{sol} (\Omega)$ | $CPE (10^{-7} F)$ | $n$   | $R_{ct} (\Omega)$ |
|-------------------------|-------------------------|--------------------|-------------------|-------|-------------------|
| <b>Au-PAni/N,S-GQDs</b> | 0                       | 20.4               | 5.40              | 0.345 | 5837              |
|                         | 10 fg mL <sup>-1</sup>  | 21.2               | 6.35              | 0.348 | 6873              |
| <b>CHIKV</b>            | 100 fg mL <sup>-1</sup> | 23.4               | 6.22              | 0.342 | 7925              |
|                         | 1 pg mL <sup>-1</sup>   | 27.5               | 5.12              | 0.370 | 9284              |
|                         | 10 pg mL <sup>-1</sup>  | 27.7               | 4.97              | 0.492 | 15052             |
|                         | 100 pg mL <sup>-1</sup> | 28.1               | 6.87              | 0.542 | 22944             |
|                         | 1 ng mL <sup>-1</sup>   | 31.6               | 5.68              | 0.563 | 35632             |

## The synthesis and TEM images of AuNP-PAni and N,S-GQDs:

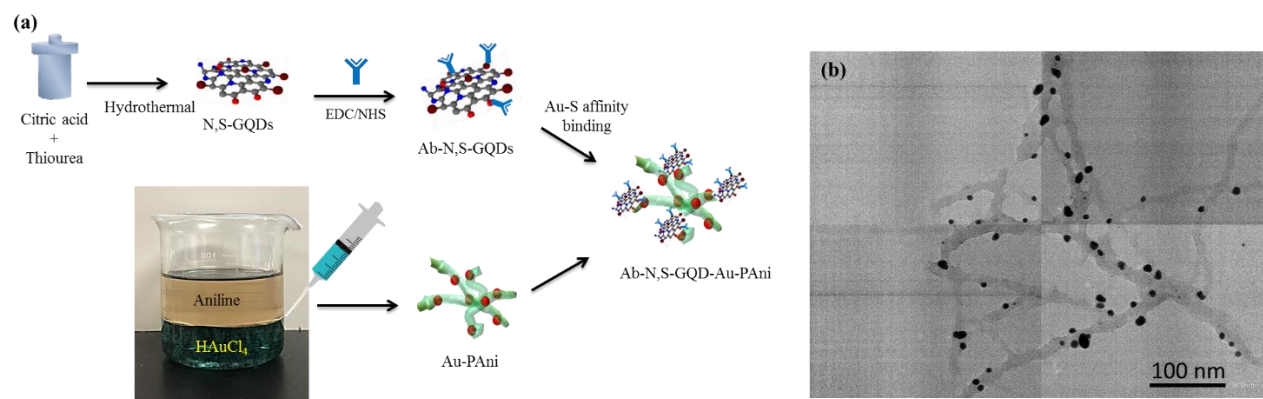

**Figure S1.** (a) Schematic illustration of Au-PAni-N,S-GQD-Ab sensor electrode, (b) TEM image of Au-PAni nanocomposite.

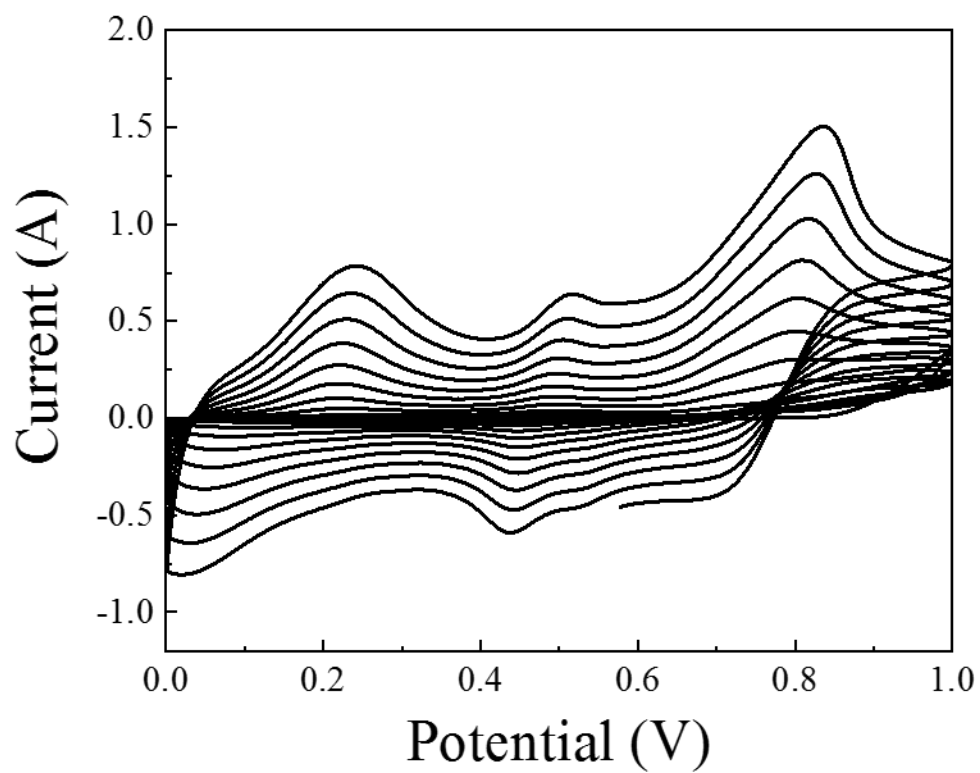

**Figure S2.** Electropolymerization of polyaniline on the bare Au electrode.

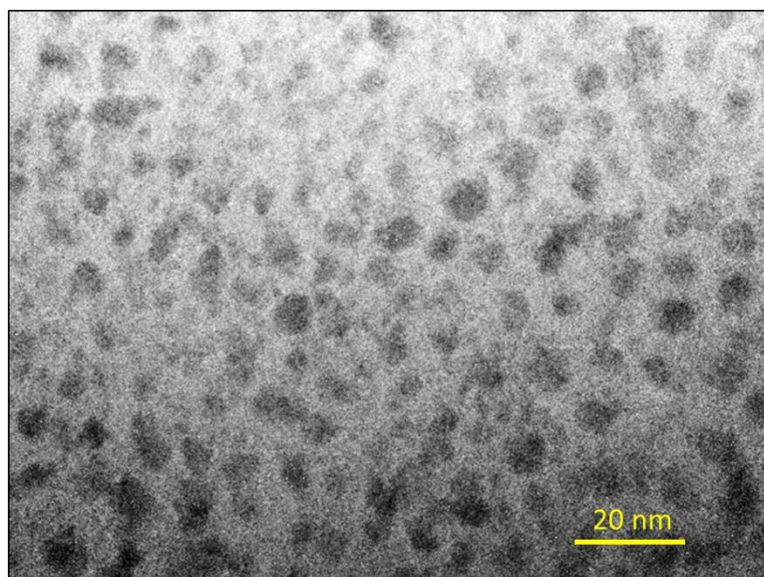

**Figure S3.** TEM image of N,S-GQDs. The small black particles with a size of 8–12 nm represent the GQD structures.

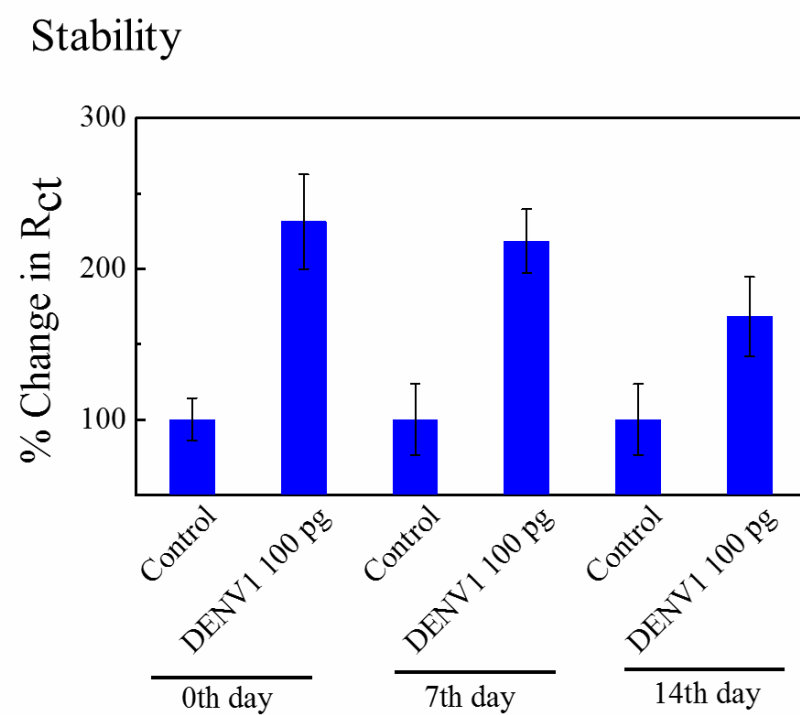

**Figure S4.** Stability test of the sensor electrodes.
